# Supplementary material for: External Evaluation of Population Pharmacokinetic Models of Methotrexate for Model-Informed Precision Dosing in Pediatric Patients with Acute Lymphoid Leukemia
Source: MDPI journal article supplement (doi:10.3390/pharmaceutics15020569), 2023-02-08
Supplement: s1 [file s1]

## Supplementary data

Table S1. Prediction error (PE) of the individual predictions (IPRED) and population predictions (PRED) to observations for the evaluated models for peak concentrations.

| Model                               | IPRED     |         |          | PRED      |         |          |
|-------------------------------------|-----------|---------|----------|-----------|---------|----------|
|                                     | Median PE | MPE (%) | RMSE (%) | Median PE | MPE (%) | RMSE (%) |
| Aumente <i>et al.</i> [21]          | 19.27     | 32.47   | 53.62    | 25.56     | 34.90   | 58.31    |
| Gao <i>et al.</i> [19]              | -47.89    | -43.23  | 47.02    | -50.31    | -44.48  | 48.44    |
| Hui <i>et al.</i> [20]              | -35.36    | -30.59  | 35.64    | -48.55    | -45.28  | 49.27    |
| Medellin-Garibay <i>et al.</i> [11] | -10.26    | -6.70   | 28.12    | -15.93    | -9.56   | 32.72    |
| Zhang <i>et al.</i> [26]            | -4.30     | -0.09   | 22.81    | -22.42    | -15.97  | 40.71    |
| Jonsson <i>et al.</i> [36]          | -20.39    | -18.38  | 26.77    | 18.33     | 29.65   | 58.19    |

MPE: mean percentage error, RMSE: root mean square error.
